# Supplementary material for: CT-2A neurospheres-derived high-grade glioma in mice: a new model to address tumor stem cells and immunosuppression
Source: PubMed Central journal article supplement (PMC6777368; doi:10.1242/bio.044552), 2019-09-11
Supplement: biolopen-8-044552-s1.pdf [file biolopen-8-044552-s1.pdf]

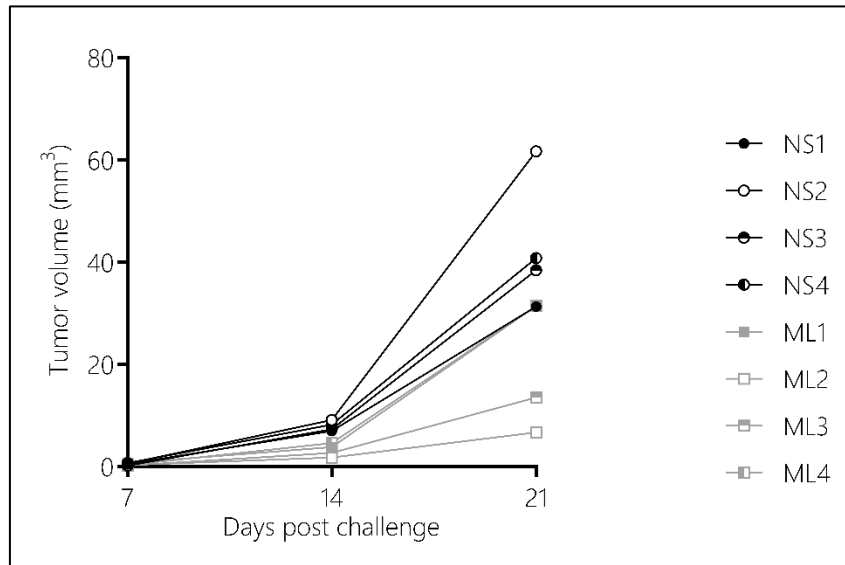

**Figure S1.** Individual tumor growth curves for NS and ML/CT-2A tumors

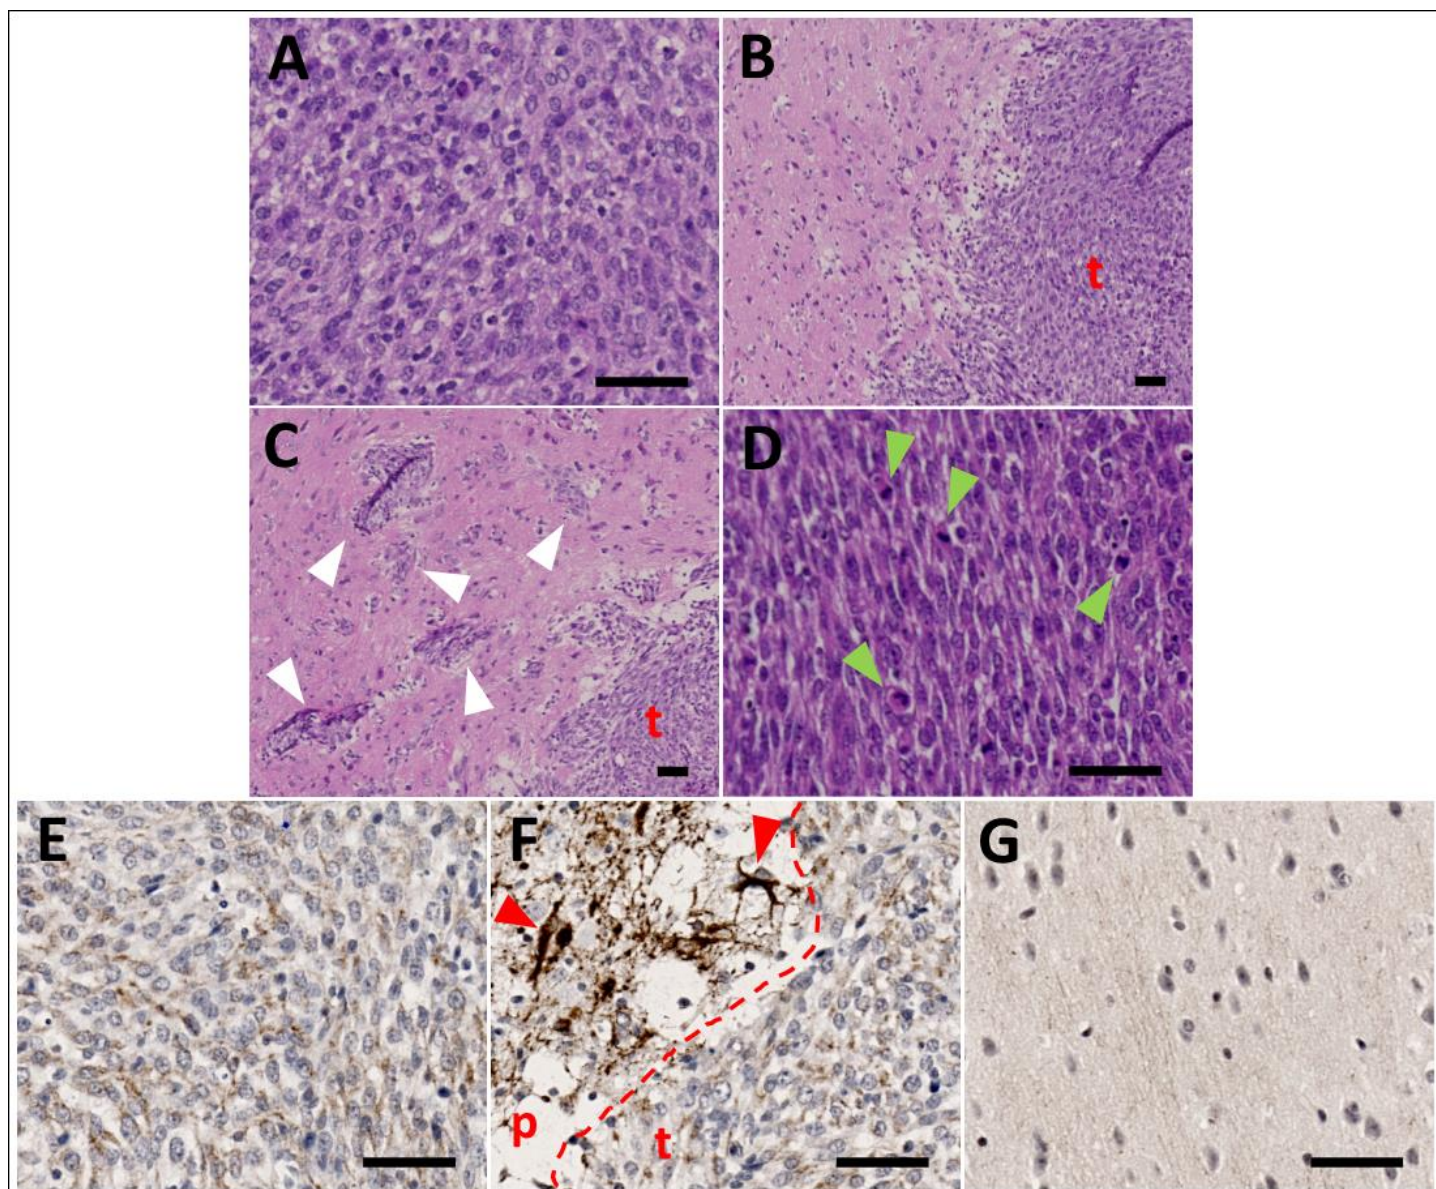

**Figure S2. H&E and GFAP stainings of NS/CT-2A tumors.** Stainings were performed at day 19 post-tumor cells inoculation. In NS/CT-2A tumor the H&E stainings demonstrated the presence high cellular density (A) and a combination of expansive (B) and invasive (C) growth with the development of satellite lesions (the largest of which are indicated by white arrowheads) at a distance from the main tumor mass. The tumor showed a high proliferation rate, with 21 mitotic figures counted at 10 HPF (diameter of each field: 0.4 mm). Examples of mitotic figures are indicated by green arrowheads in D. NS/CT-2A tumors showed diffuse positivity for GFAP (E). Reactive astrocytes (some of them indicated by red arrowheads) were visible at the tumor margin (F). The contralateral striatum was substantially negative for GFAP (G). Abbreviations: t, tumor mass; p, peritumor area. Dashed line in F represents the limit between the tumor mass and the peritumor area. Scale bars: 50 μm.

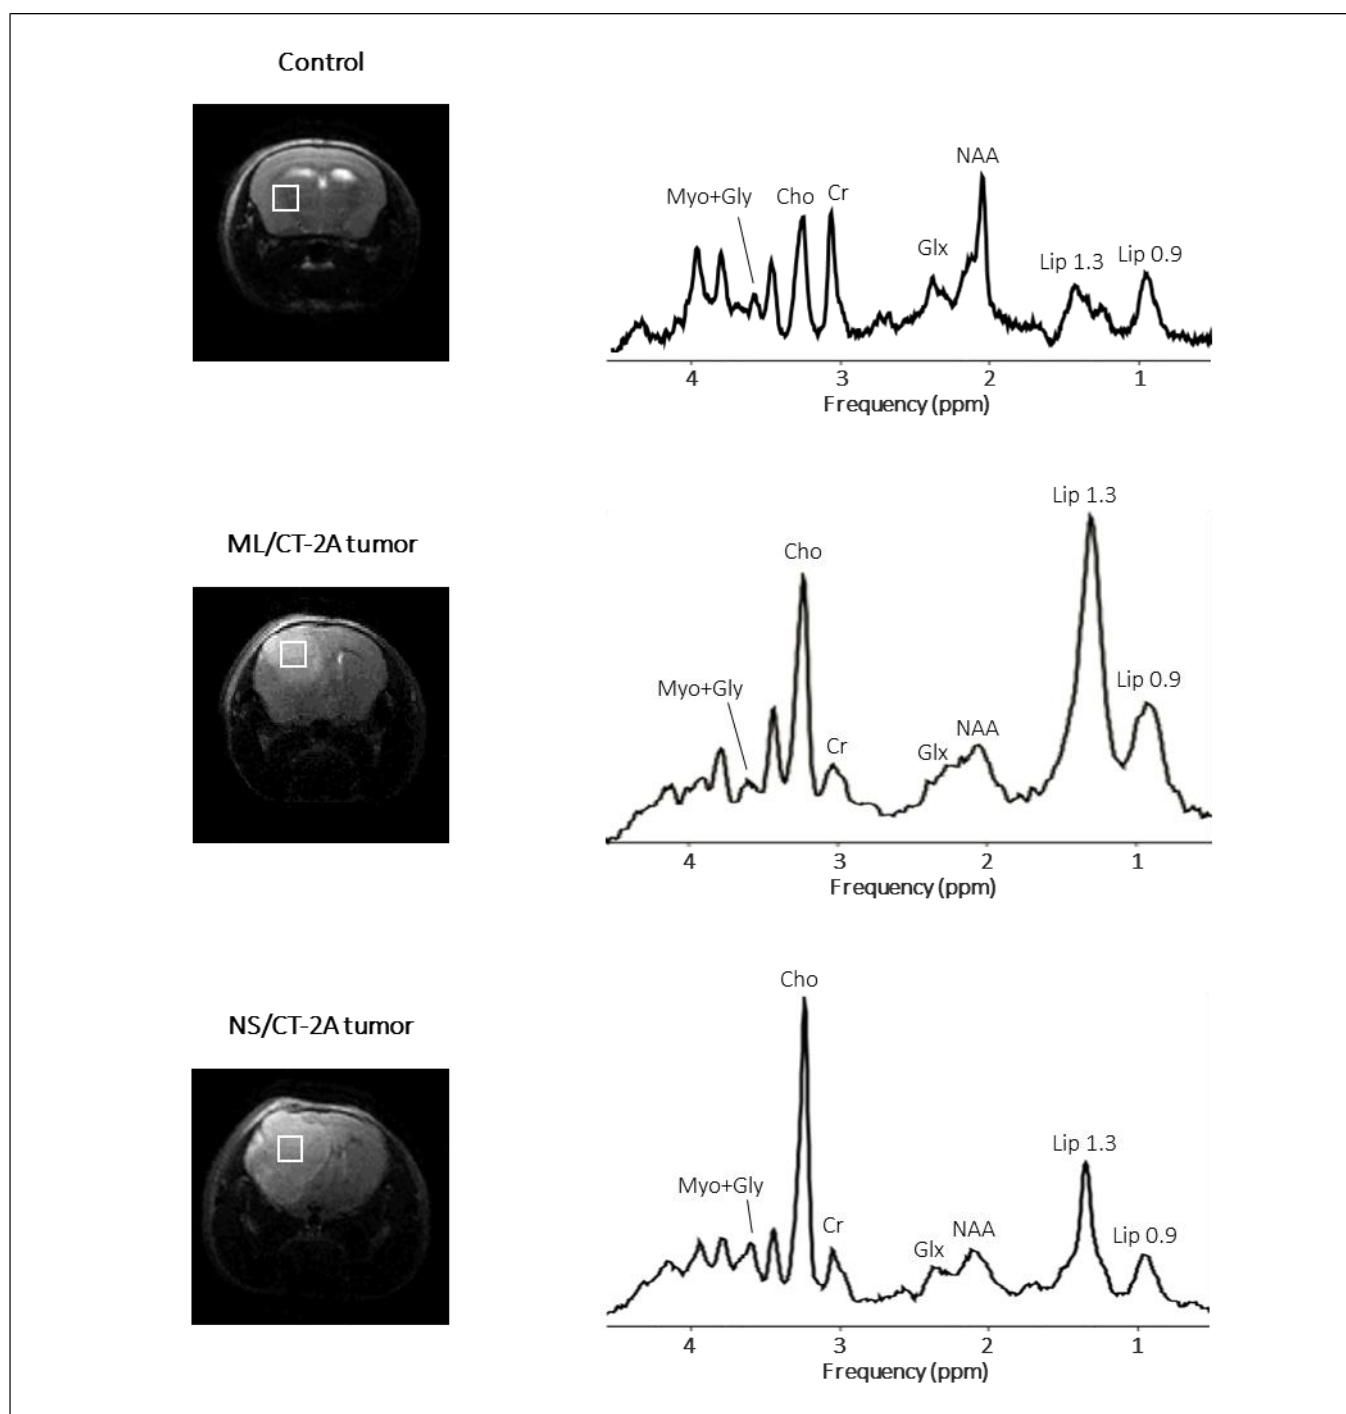

**Figure S3.** Representative voxel position on axial T2-weighted brain MRI (left panels) and corresponding MRS spectra (right panels) of control healthy mice, ML/CT-2A and NS/CT-2A tumors.

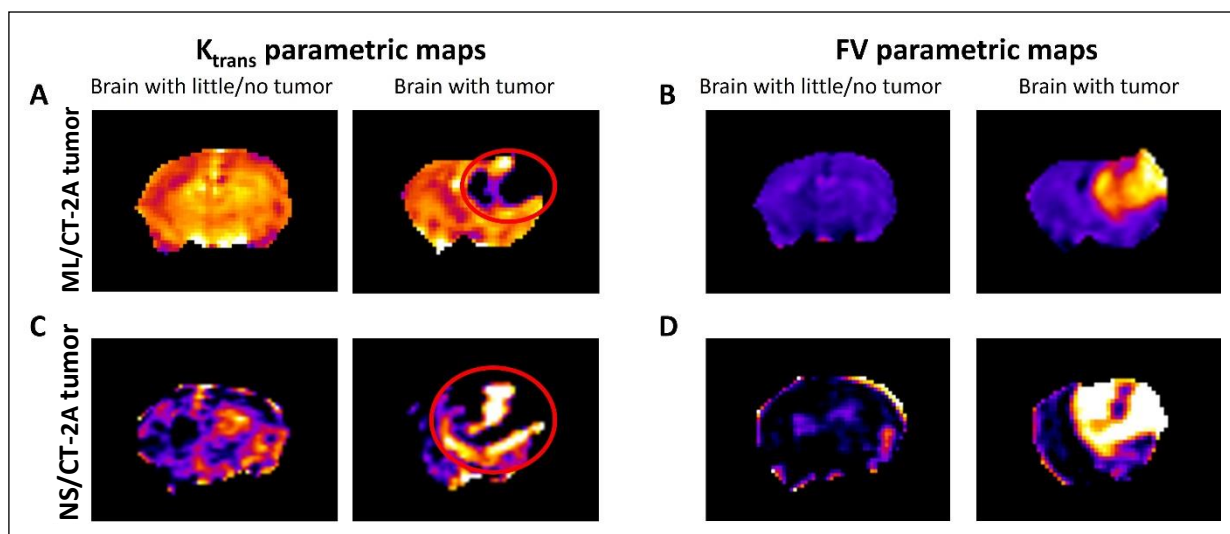

Figure S4. Representative  $k_{trans}$  and fractional volume (FV) parametric maps of the brain of mice harboring ML/CT-2A and NS/CT-2A tumors. The left image of the respective panels shows a slice with no (little) tumor ('control' region) while the right image of the respective panels shows the slice with maximal tumor size. Tumors are indicated with a red circle on the  $k_{trans}$  parametric maps. All tumors in both categories are perfused. Tumors grown from neurospheres are largest as indicated by the tumor spreading over all four slices acquired and by the tumor spreading to both hemispheres of the brain.

Figure S5a: flow-cytometrygating strategy for in-vivo TAMs (full and dashed lines) and in-vitro MFs (full lines only)

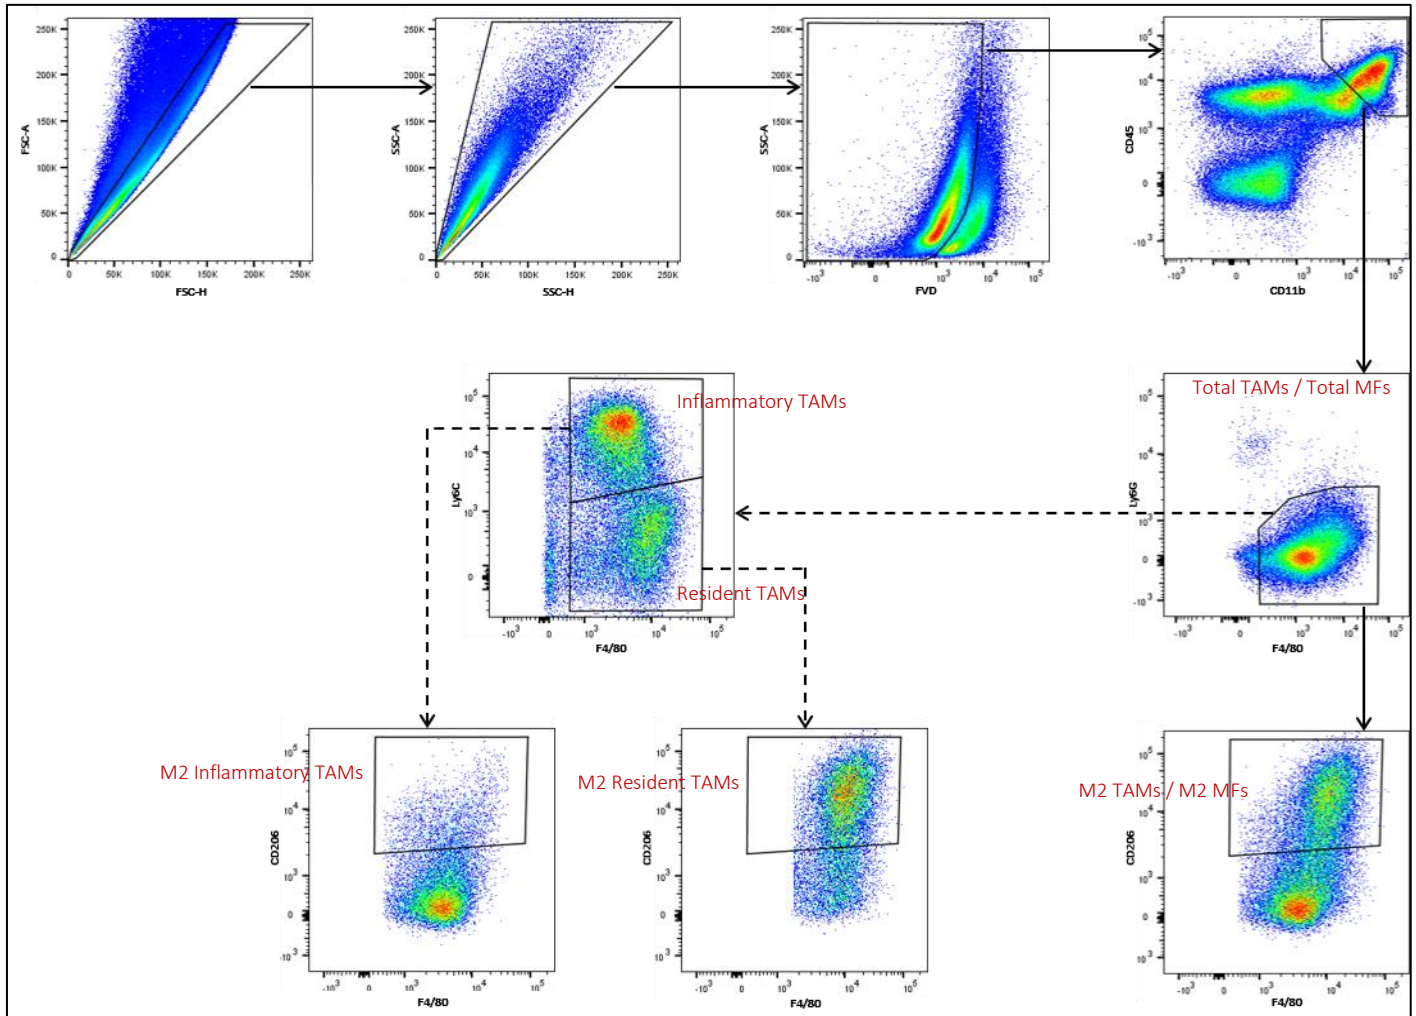

Figure S5b: flow-cytometrygating strategy for in-vivo and in-vitro MDSCs

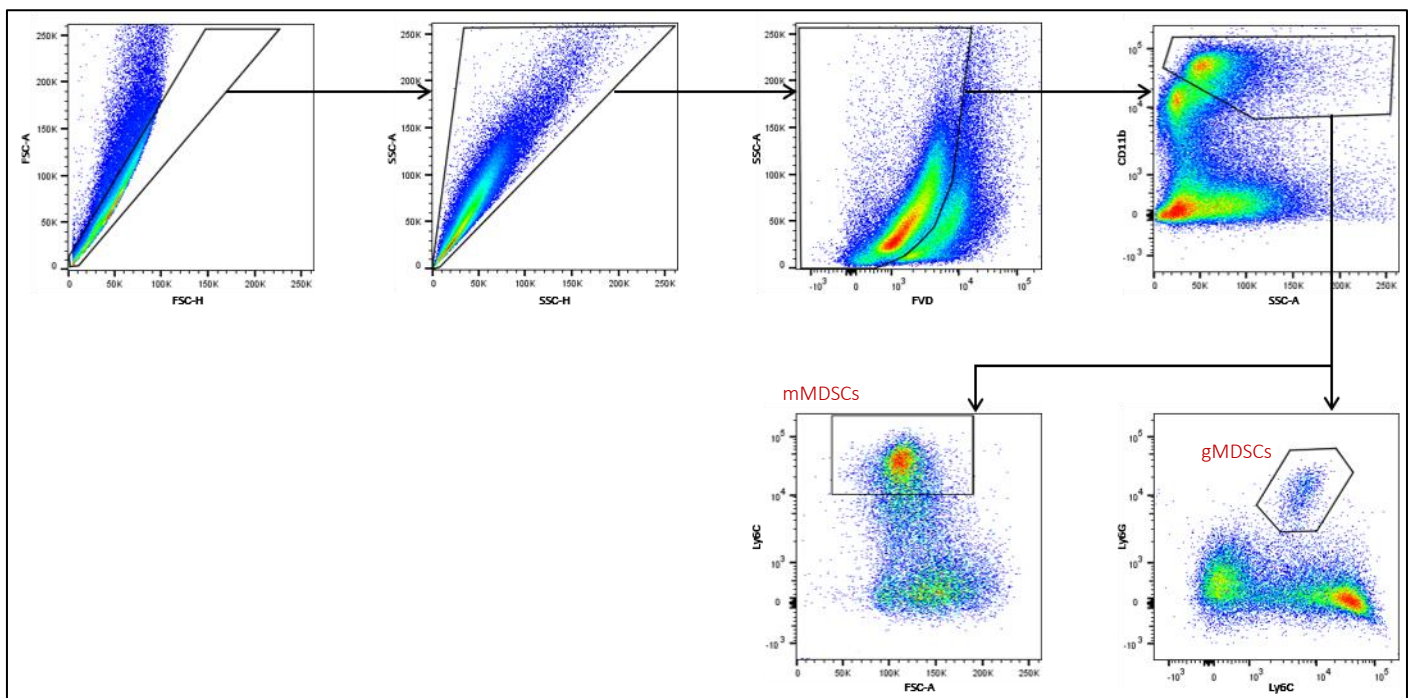

Figure S5c: flow-cytometry gating strategy for in-vivo and in-vitro T cells

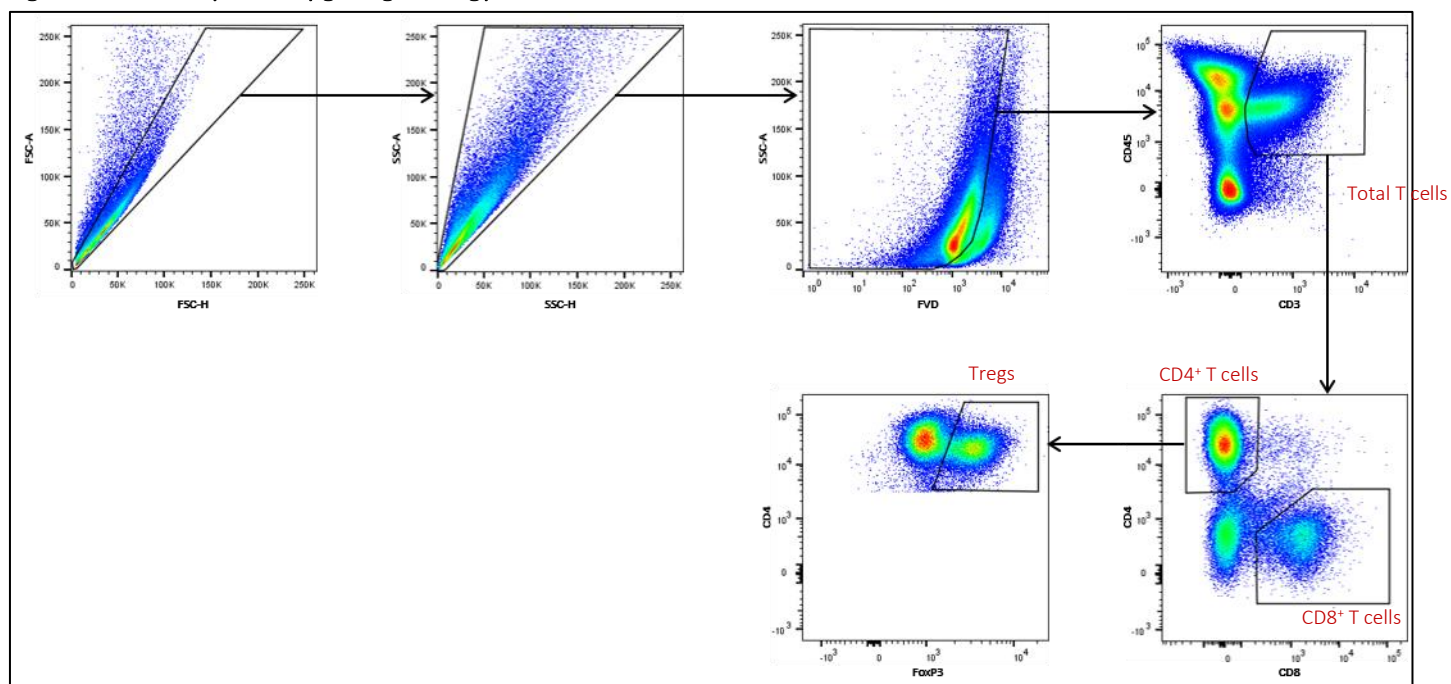

Figure S5d: antibody panels for flow-cytometry

TAMs/MFs and MDSCs

| Target | Fluorophore   | Clone       | Company        |
|--------|---------------|-------------|----------------|
| CD11b  | PerCp Cy5.5   | M1/70       | eBioscience    |
| CD45   | APC           | 104         | eBioscience    |
| Ly6G   | Fitc          | 1A8         | BD Biosciences |
| Ly6C   | APC eFluor780 | HK1.4       | Invitrogen     |
| MHC II | PE-Cy7        | M5/114.15.2 | eBioscience    |
| F4/80  | BV421         | T45-2342    | BD Biosciences |
| CD206  | PE            | C068C2      | Biolegend      |

T cells

| Target | Fluorophore   | Clone    | Company        |
|--------|---------------|----------|----------------|
| CD45   | APC           | 104      | eBioscience    |
| CD3    | APC eFluor780 | 145-2C11 | eBioscience    |
| CD4    | PerCP Cy5.5   | RM4-5    | eBioscience    |
| CD8    | BV421         | 53-6.7   | BD Biosciences |
| FoxP3  | AF488         | R16715   | BD Biosciences |

|                            |                              |
|----------------------------|------------------------------|
| Nucleus: Area              | Cell: Min caliper            |
| Nucleus: Perimeter         | Cell: Eccentricity           |
| Nucleus: Circularity       | Cell: Channel 1 mean         |
| Nucleus: Max caliper       | Cell: Channel 1 std dev      |
| Nucleus: Min caliper       | Cell: Channel 1 max          |
| Nucleus: Eccentricity      | Cell: Channel 1 min          |
| Nucleus: Channel 1 mean    | Cell: Channel 2 mean         |
| Nucleus: Channel 1 sum     | Cell: Channel 2 std dev      |
| Nucleus: Channel 1 std dev | Cell: Channel 2 max          |
| Nucleus: Channel 1 max     | Cell: Channel 2 min          |
| Nucleus: Channel 1 min     | Cell: Channel 3 mean         |
| Nucleus: Channel 1 range   | Cell: Channel 3 std dev      |
| Nucleus: Channel 2 mean    | Cell: Channel 3 max          |
| Nucleus: Channel 2 sum     | Cell: Channel 3 min          |
| Nucleus: Channel 2 std dev | Cytoplasm: Channel 1 mean    |
| Nucleus: Channel 2 max     | Cytoplasm: Channel 1 std dev |
| Nucleus: Channel 2 min     | Cytoplasm: Channel 1 max     |
| Nucleus: Channel 2 range   | Cytoplasm: Channel 1 min     |
| Nucleus: Channel 3 mean    | Cytoplasm: Channel 2 mean    |
| Nucleus: Channel 3 sum     | Cytoplasm: Channel 2 std dev |
| Nucleus: Channel 3 std dev | Cytoplasm: Channel 2 max     |
| Nucleus: Channel 3 max     | Cytoplasm: Channel 2 min     |
| Nucleus: Channel 3 min     | Cytoplasm: Channel 3 mean    |
| Nucleus: Channel 3 range   | Cytoplasm: Channel 3 std dev |
| Cell: Area                 | Cytoplasm: Channel 3 max     |
| Cell: Perimeter            | Cytoplasm: Channel 3 min     |
| Cell: Circularity          | Nucleus/Cell area ratio      |
| Cell: Max caliper          |                              |

Table S1. List of 55 parameters used by the software QuPath to detect positive and negative cells.
